# Supplementary material for: Programmed death one homolog maintains the pool size of regulatory T cells by promoting their differentiation and stability
Source: PubMed Central journal article supplement (PMC5519767; doi:10.1038/s41598-017-06410-w), 2017-07-20

## Supplemental Materials

### **Programmed death one homolog maintains the pool size of regulatory T cells by promoting their differentiation and stability**

Qi Wang<sup>1</sup>, Jianwei He<sup>1</sup>, Dallas B. Flies<sup>2</sup>, Liqun Luo<sup>1</sup> and Lieping Chen<sup>1,2</sup>

<sup>1</sup>Laboratory of Immunotherapy, Sun Yat-Sen University, Guangzhou, Guangdong, PRC

<sup>2</sup>Department of Immunobiology, Yale University, New Haven, Connecticut, USA

Correspondence: [Lieping.Chen@yale.edu](mailto:Lieping.Chen@yale.edu)

**Supplementary Figure 1: PD-1H affects *de novo* differentiation of iTreg cells.** (A) WT and KO OT-II T cells (CD25<sup>-</sup> T cells) were transferred into host mice separately. The transferred OT-II T cells were labelled with CFSE before being transferred. The figure shown here is the dilution of CFSE and Foxp3 induction. (B) WT (CD45.1/CD45.2) naïve OT-II T cells and KO (CD45.2) OT-II naïve T cells were mixed at a 1:1 ratio and co-transferred into host mice (CD45.1). After orally feeding the host mice with 1.5% OVA, the mLN and PP were analysed and the frequency of Foxp3 were determined by intracellular staining. (C) The absolute number of Foxp3<sup>+</sup> T cells in the indicate organs were counted.

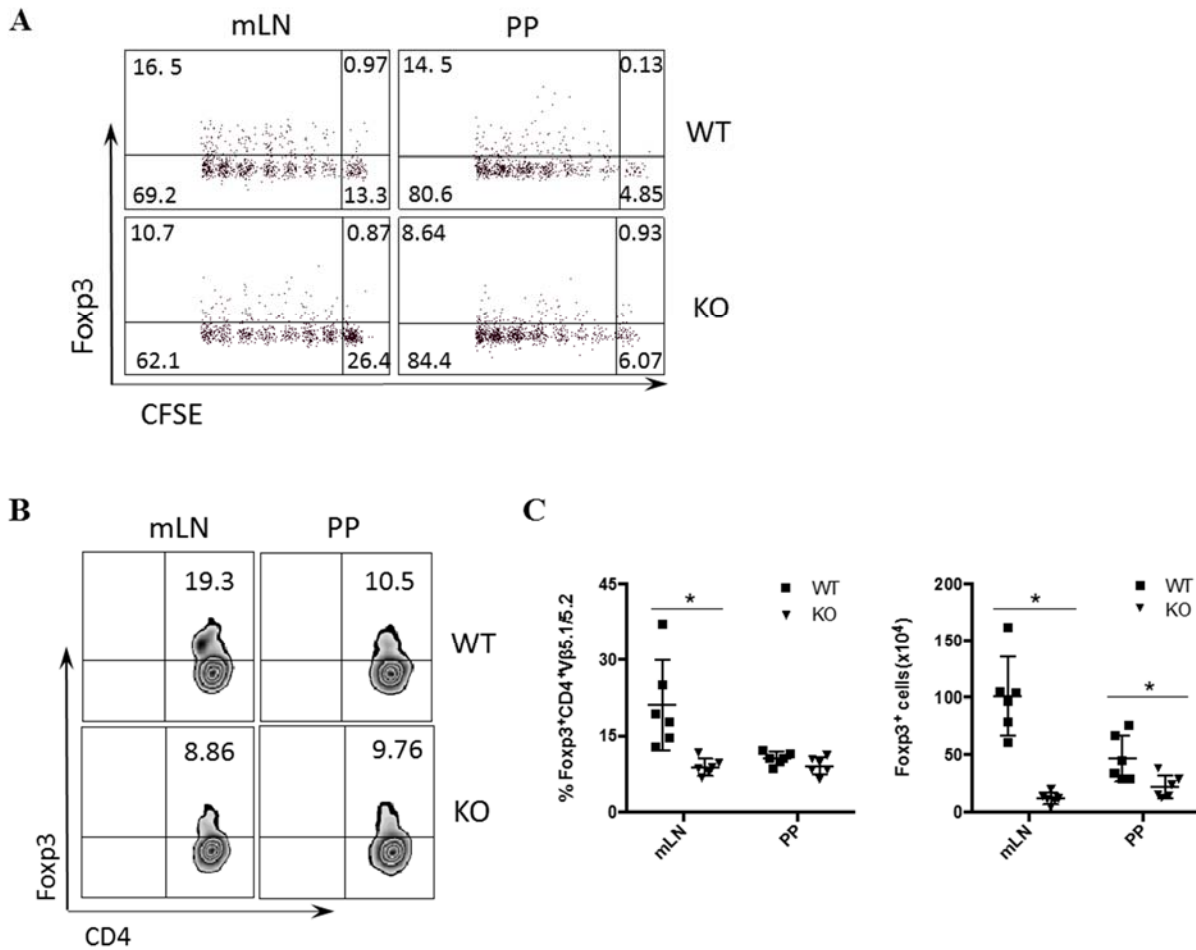

**Supplementary Figure 2: PD-1H regulates differentiation of iTreg cells in a lymphopenic environment.** (A) Naïve CD4<sup>+</sup>CD62L<sup>hi</sup> T cells from WT mice (CD45.2) and PD-1H KO mice (CD45.1) were mixed at ratio of 1:1 and a total of 2 million cells were transferred into Rag1 KO mice (n=4); Foxp3's upregulation was determined 20 days later. This figure shows the change in ratio of WT and KO CD4<sup>+</sup> T cells before and after transfer. The frequency of Foxp3<sup>+</sup> cells was determined by intracellular staining. (B) Absolute numbers of CD25<sup>+</sup>Foxp3<sup>+</sup> T cells in the indicated organs from the Rag1 KO mice were counted. (C) Cytokine production of transferred naïve CD4<sup>+</sup> T cells was analysed. Cells from the indicated organs were activated *in vitro* for 4 hours in the presence of PMA/Ionomycin/BFA and then analysed by intracellular staining. Data shown are representative of 2 independent experiments.

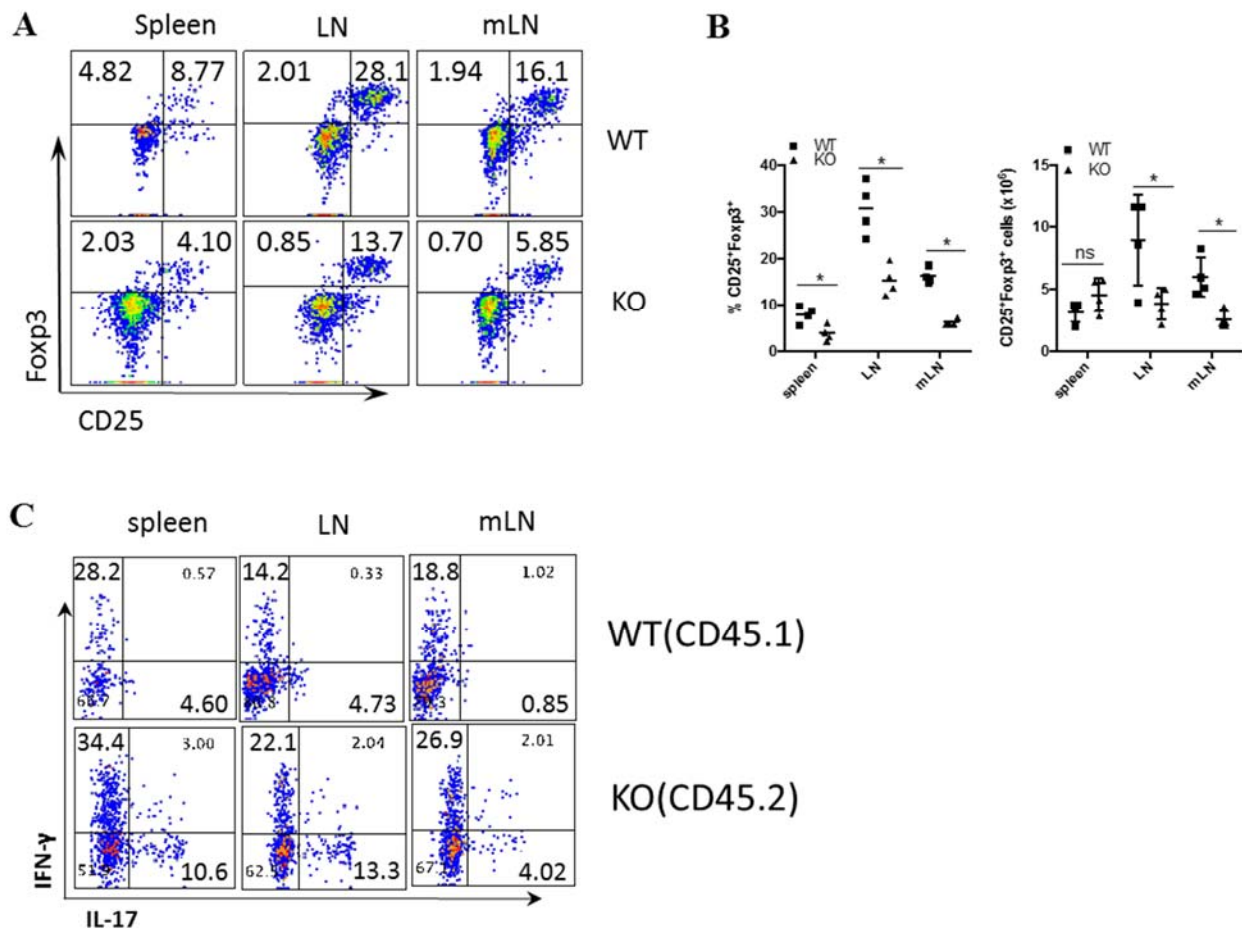

**Supplementary Figure 3: PD-1H plays a redundant role on the generation and suppressive function of nTreg cells.** (A) The percentage of CD25<sup>+</sup>Foxp3<sup>+</sup> nTreg in the spleen and LN was determined by Flow cytometry using intracellular staining for Foxp3 and cell surface staining of CD25. Six weeks old littermates from WT and PD-1H KO mice (n=5) were used. The absolute numbers of Foxp3<sup>+</sup>CD25<sup>+</sup> T cells in the spleen and LN were counted. (B) The expression of CD25, GITR, Lag-3, CTLA-4, ICOS and PD-1 on the nTreg from WT or PD-1H KO Foxp3(GFP) mice were determined by flow cytometry gating on the CD4<sup>+</sup>Foxp3(GFP<sup>+</sup>) cells. (C) Foxp3(GFP<sup>+</sup>) nTreg from WT or PD-1H KO Foxp3(GFP) mice were sorted and co-cultured at various Treg/Teff ratios with CFSE-labelled CD8<sup>+</sup> Teff cells in the presence of mitomycin C treated spleen cells plus anti-CD3 for 3 days. The CFSE dilution was determined by flow cytometry. Data shown are representative of at least 3 independent experiments.

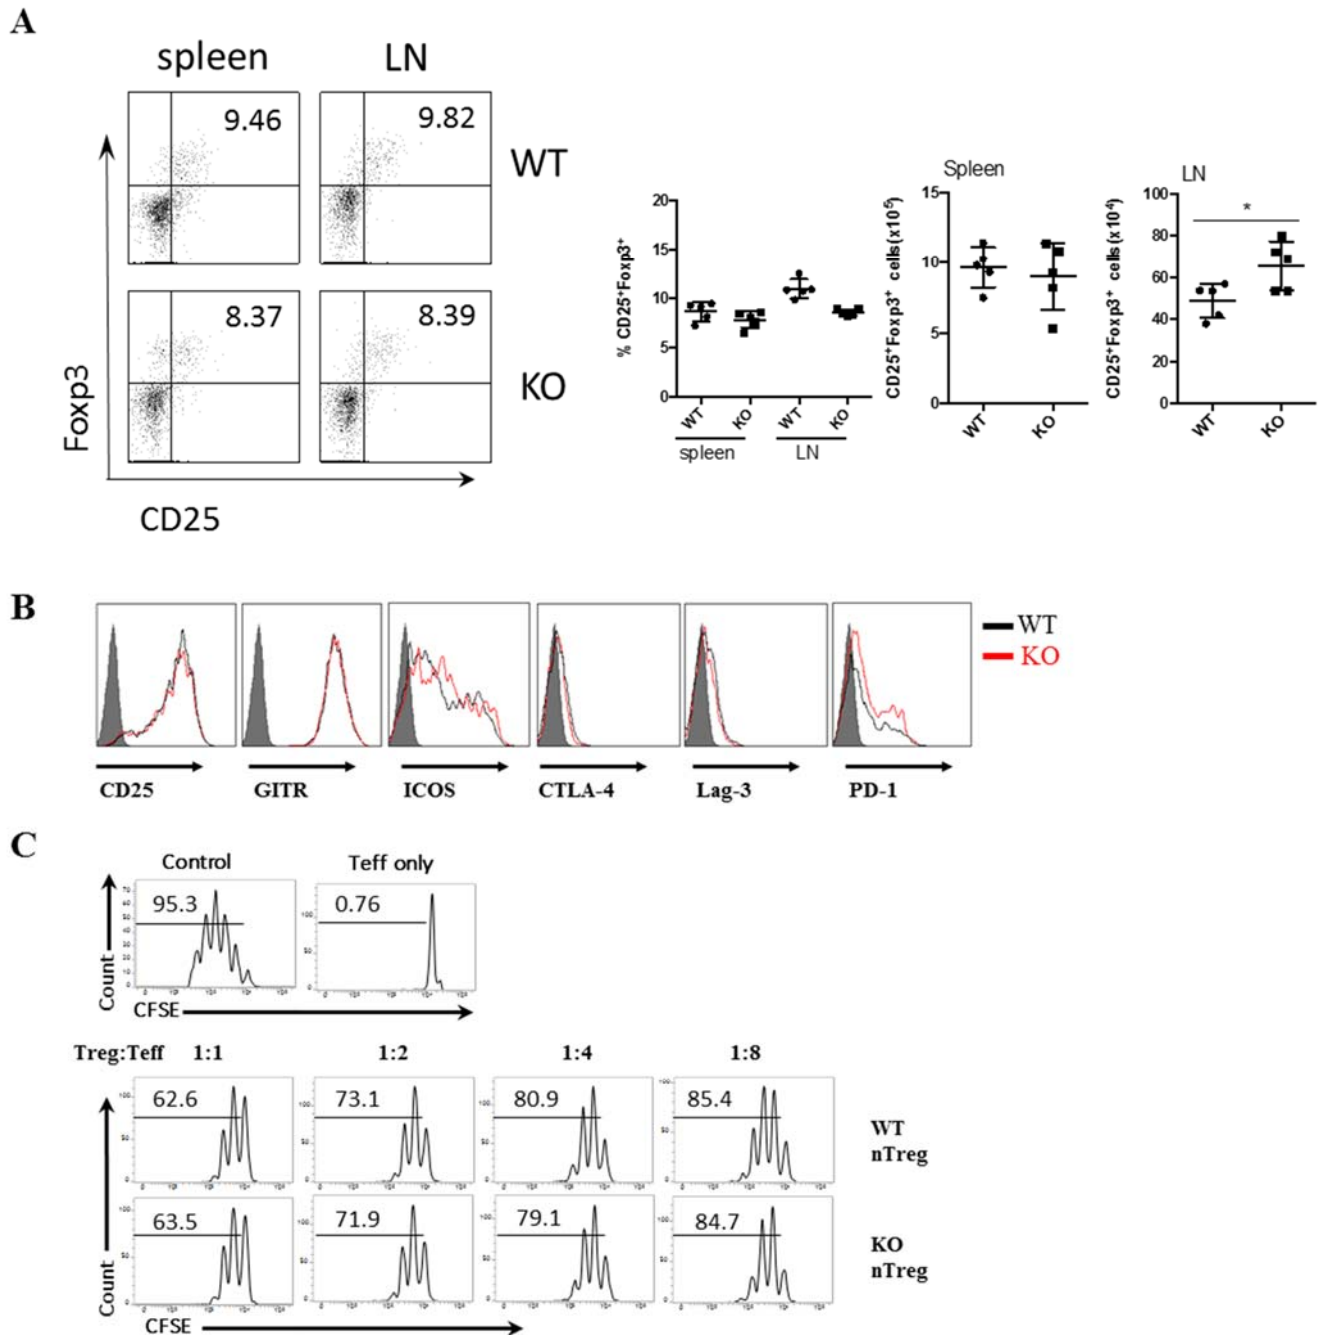

**Supplementary Figure 4: PD-1H determines the pool size of Treg cells in bone marrow chimeric mice.** (A) A total of 10 million mixed bone marrow cells from CD45.1 WT mice and CD45.2 mice were transferred into sub-lethally irradiated mice (CD45.1/CD45.2). Mice were analysed 10 weeks after reconstruction. The gating strategy for the WT and KO T cells was shown. (B) Foxp3 frequency in the indicated organs was determined by intracellular staining. (C) Foxp3 frequency in the spleen were summarized, and the absolute number of Foxp3<sup>+</sup> cell and Foxp3<sup>-</sup> cells were shown. Data shown are one of two independent experiments.

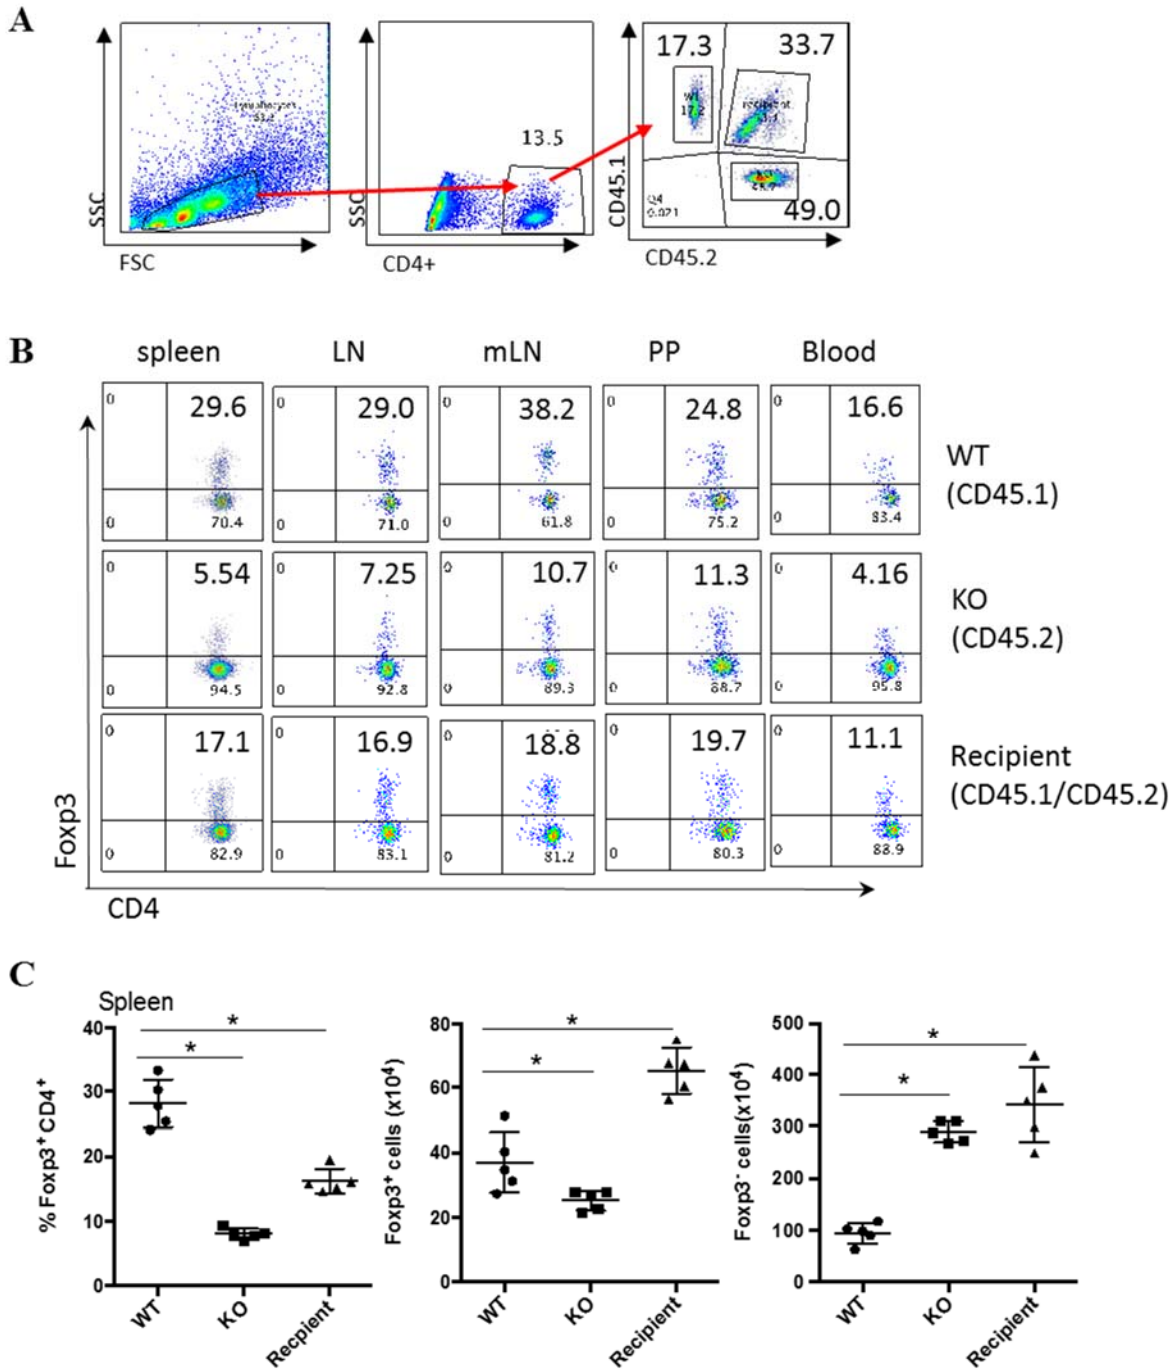

**Supplementary Figure 5: PD-1H agonist mAb slightly promotes the differentiation of iTreg cells**

(A) Naïve T cells were sorted from the WT Foxp3 (GFP) mice and subsequently stimulated with pre-coated anti-CD3 with either control mouse IgG or mam82 in the presence of TGF- $\beta$  for 4 days. CD25<sup>+</sup>Foxp3 (GFP<sup>+</sup>) iTreg cells were analysed by flow cytometry. (B) Induction of iTreg cells at different time points were shown. The results shown are from 3 individual experiments. Data shown are representative of at least 3 independent experiments.

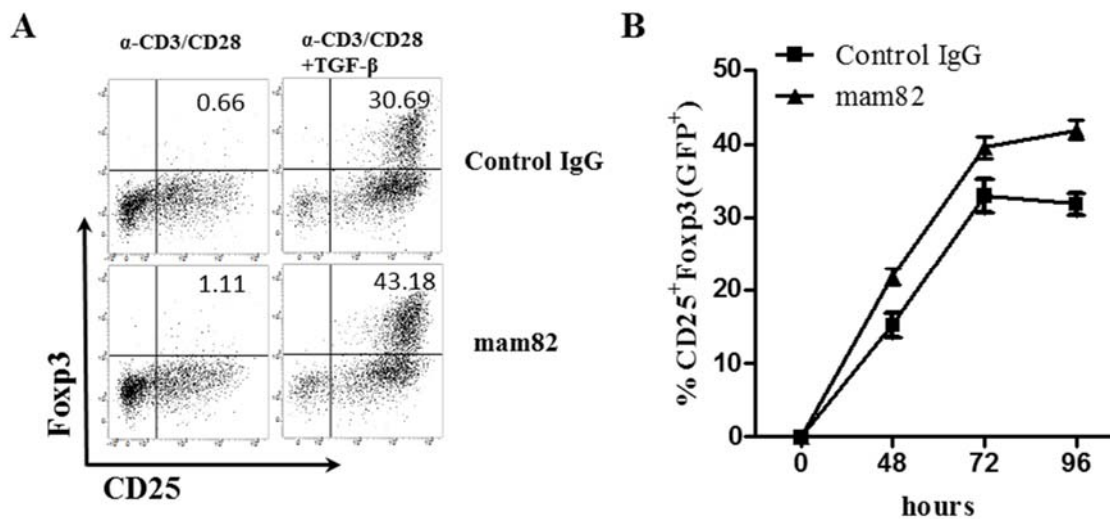

**Supplementary Figure 6: Analysis of CD4<sup>+</sup> Th1 and Th17 cells in recipients upon transferring with WT or PD-1H KO iTreg cells in the EAE model.** (A) Naïve T cells from WT or PD-1H KO Foxp3 (GFP) mice were differentiated into iTreg cells *in vitro* as described above. IFN- $\gamma$  and IL-4 neutralizing mAb were added to the cultures to promote the generation of iTreg. Foxp3 (GFP<sup>+</sup>) cells were sorted and the purity was assessed by FACS. (B,C) In the EAE model after the transfer of iTreg cells, recipient CD45.1<sup>+</sup>CD4<sup>+</sup> T cells were re-stimulated *ex vivo* by PMA/Ionomycin/BFA. IFN- $\gamma$ <sup>+</sup> or IL-17<sup>+</sup> cells of recipient CD4<sup>+</sup> T cells were determined using intracellular staining, gated on CD45.2-CD4<sup>+</sup> T cells. Data from a representative pair of mice were shown in (B) and a graphic plot of the data was shown from a group of 4 or 5 mice (C). Data shown were representative of at least 3 independent experiments.

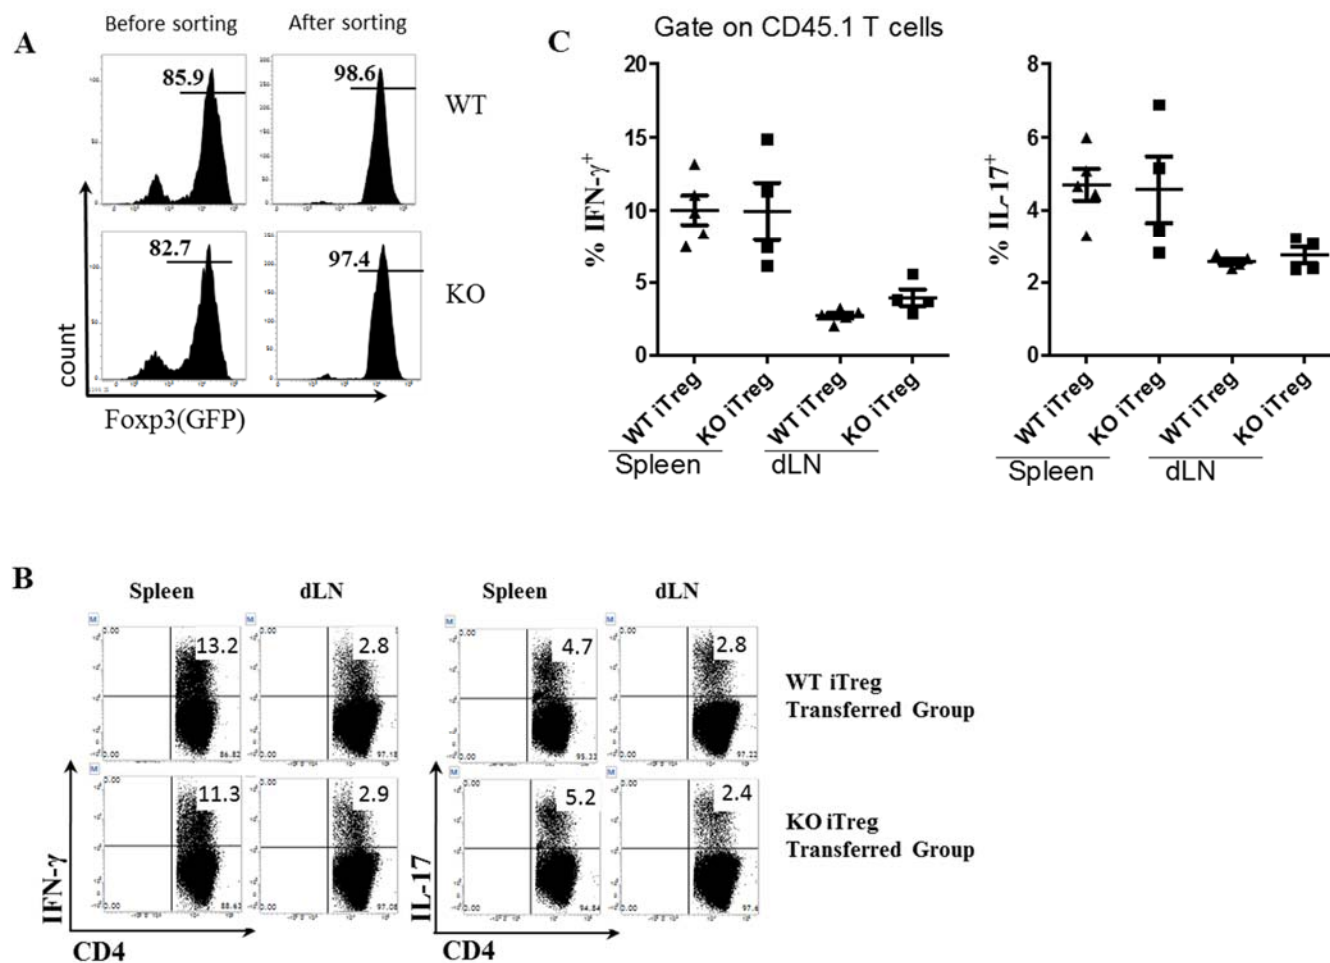

**Supplementary Figure 7: PD-1H deficient iTreg cells fail to retain their suppressive function and Foxp3 expression.** (A) The weight of Rag1 KO host mice (n=5 per group) at various times after the transfer of CD25<sup>+</sup>CD45RB<sup>hi</sup> CD45.1 T cells alone or together with CD45.2<sup>+</sup>Foxp3(GFP<sup>+</sup>) iTreg cells from WT or KO mice (As described in Methods). Weight changes of recipient mice after transfers were normalized to their initial weight before the transfer. \*P<0.05, (two-way ABOVA test). (B) H&E staining of colon tissues (Scale Bar: 100  $\mu$ m) and clinical score (C) from the Rag1 KO host mice after inducing colitis (week 10, n=5). (D, E, F) Percentage of Foxp3<sup>+</sup> T cells among CD45.2 Treg cells in the spleen and dLN from Rag1 KO host mice were analysed and absolute numbers of Foxp3<sup>+</sup>CD45.2 T cells were counted based on the ratio and live cells. (G) Flow cytometry analysing the expression of IFN- $\gamma$  and IL-17 in CD45.2 Treg cells in the indicated organs from Rag1 KO mice. Spleen cells and dLN cells were stimulated with PMA/Ionomycin/BFA *in vitro* for 4 hours and stained for intracellular cytokine. (H) Summary of data in (G), each dot represents one mouse. (I) Flow cytometry analysing the expression of IFN- $\gamma$  and IL-17 in Teff cells (CD45.1) in the indicated organs from Rag1 KO host mice. Spleen cells and dLN cells were stimulated with PMA/Ionomycin/BFA *in vitro* for 4 hours and stained for intracellular cytokines. Data shown are representative one of 2 independent experiments.

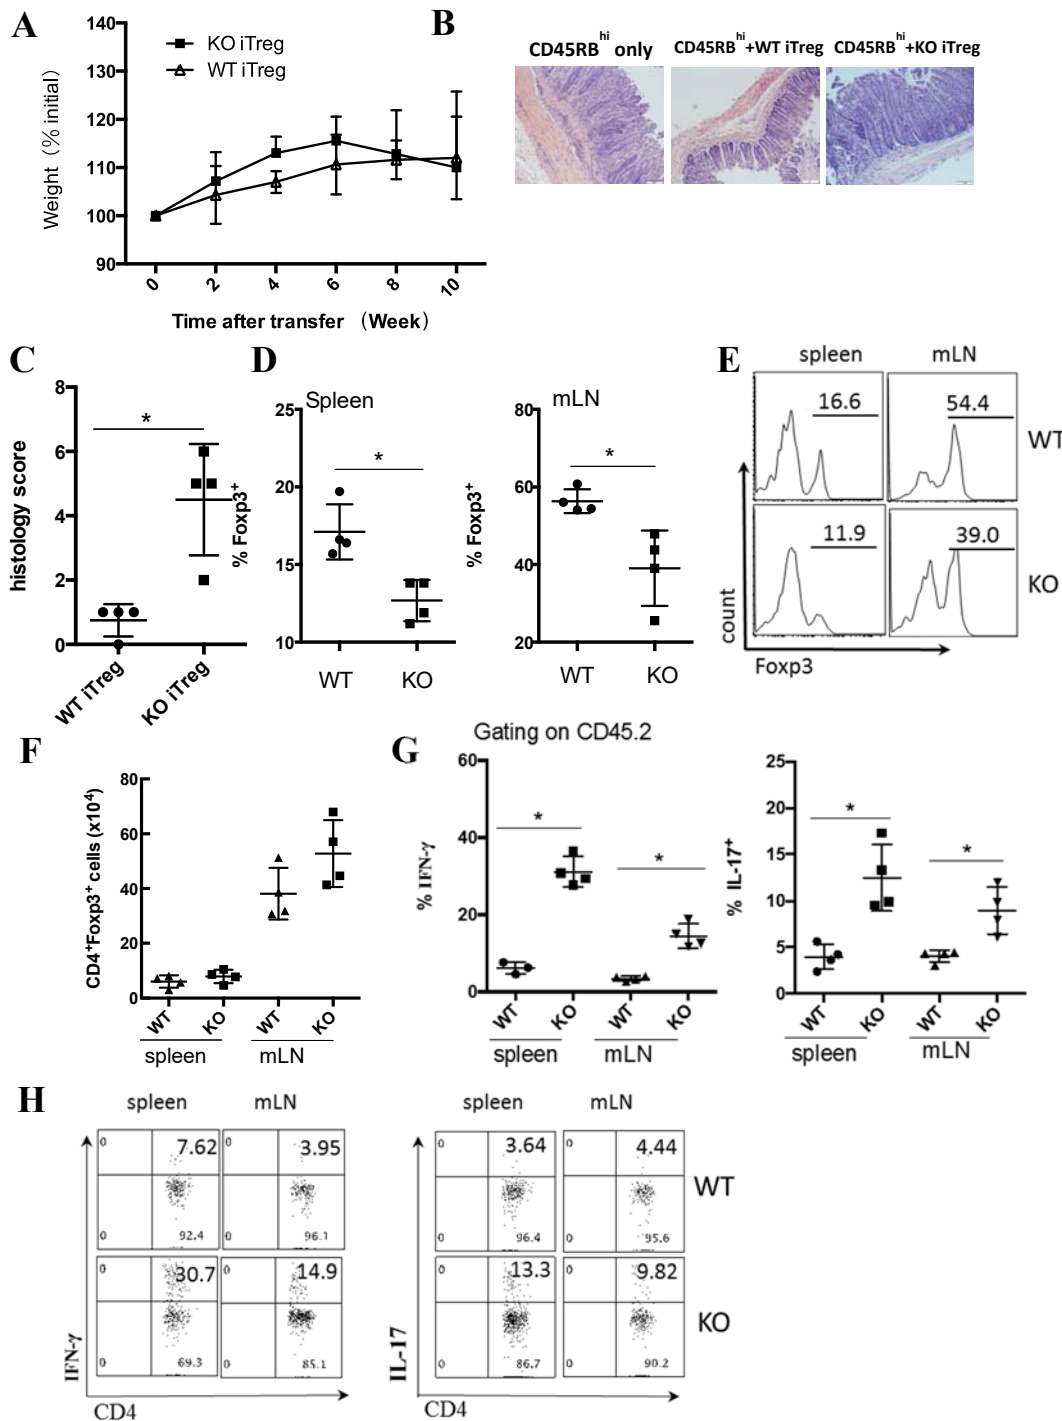



**I** Colitis model-activation of Teff (CD45.1)

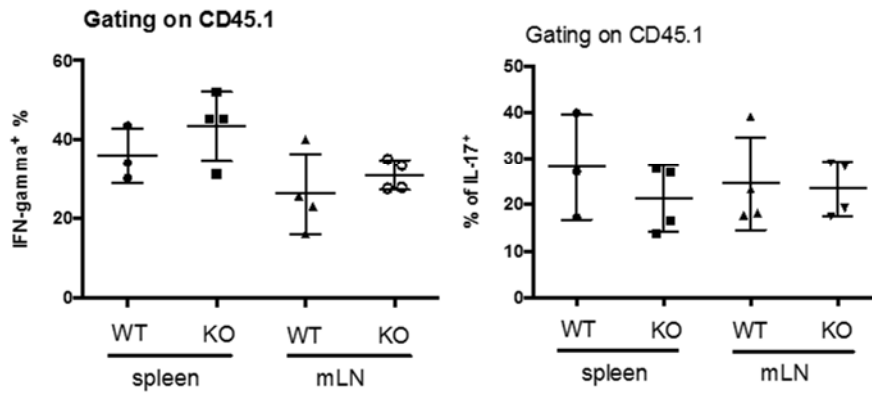

Supplement: 41598_2017_6410_MOESM1_ESM.pdf [file 41598_2017_6410_MOESM1_ESM.pdf]
